# Supplementary material for: Mayaro Virus Non-Structural Protein 2 Circumvents the Induction of Interferon in Part by Depleting Host Transcription Initiation Factor IIE Subunit 2
Source: MDPI journal article supplement (doi:10.3390/cells10123510), 2021-12-12
Supplement: s1 [file s1]

## Supplementary Materials

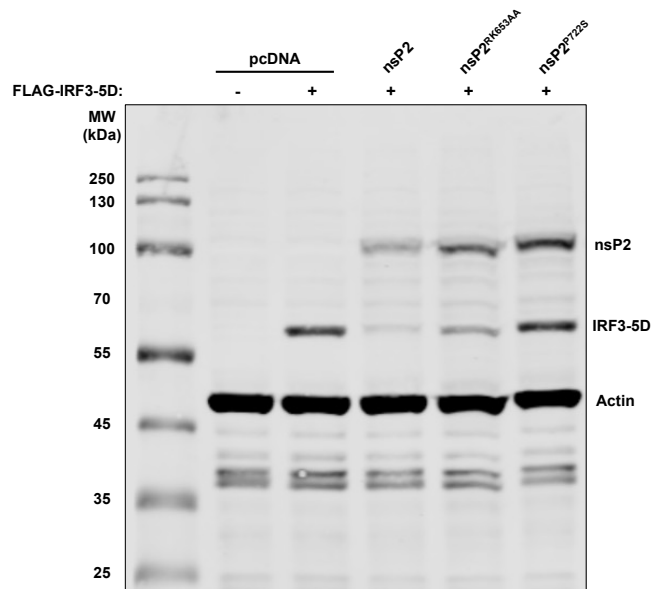

**Figure S1.** Full blot image from Figure 3E.

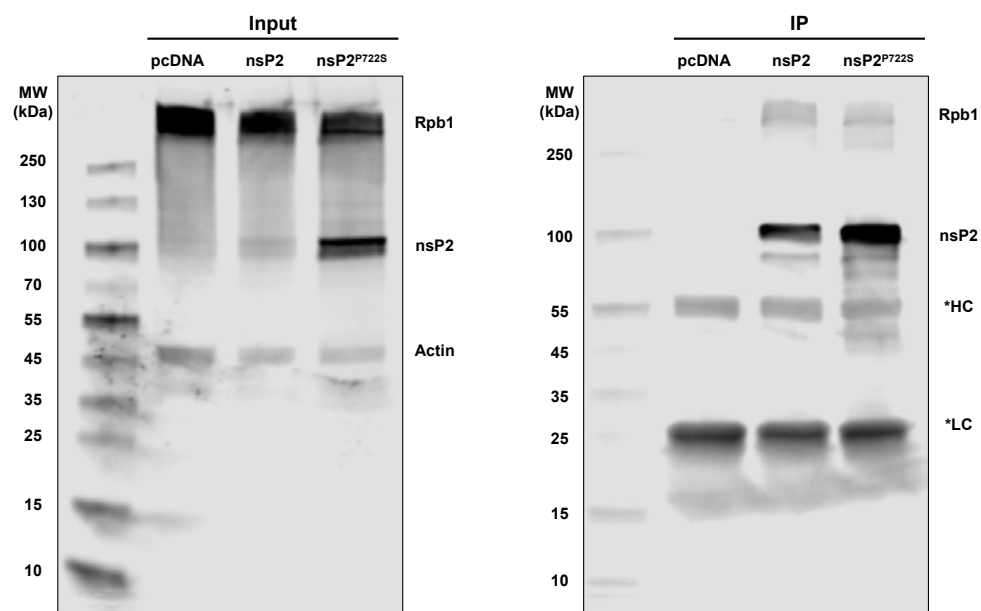

**Figure S2.** Full blot images from Figure 4B.

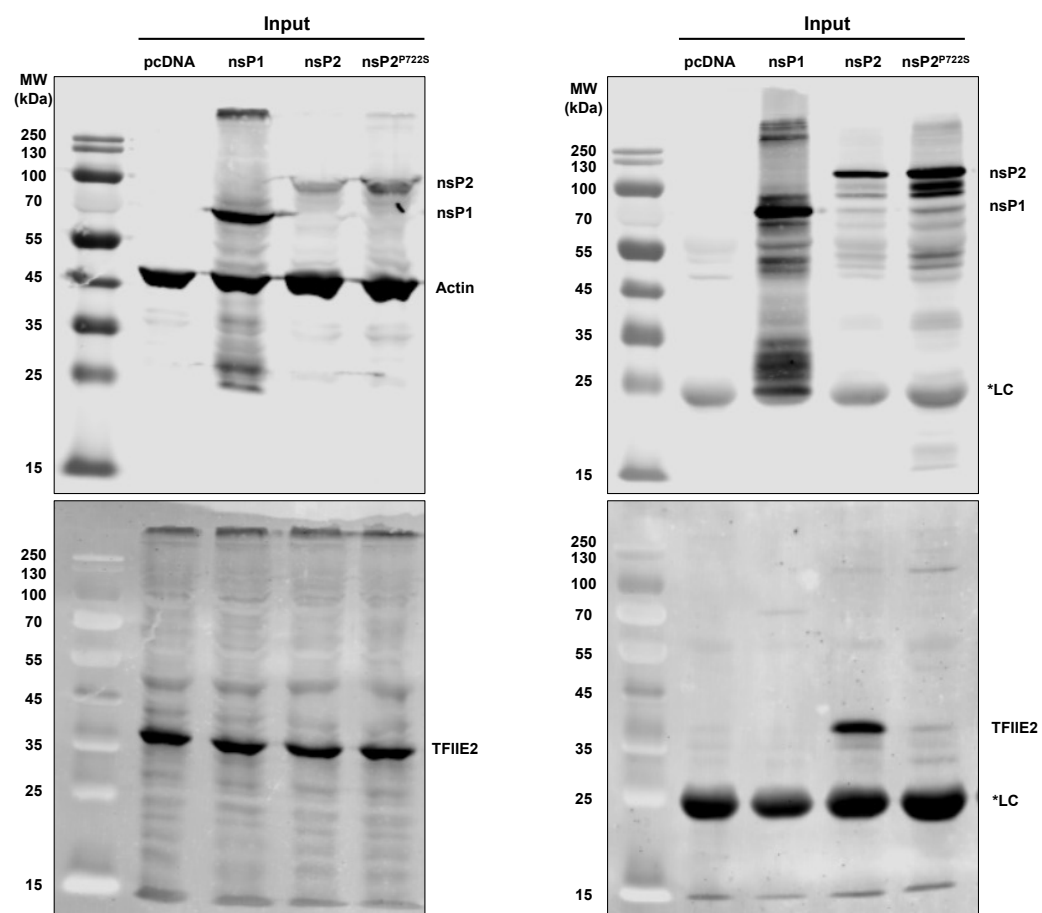

**Figure S3.** Full blot images from Figure 4C.

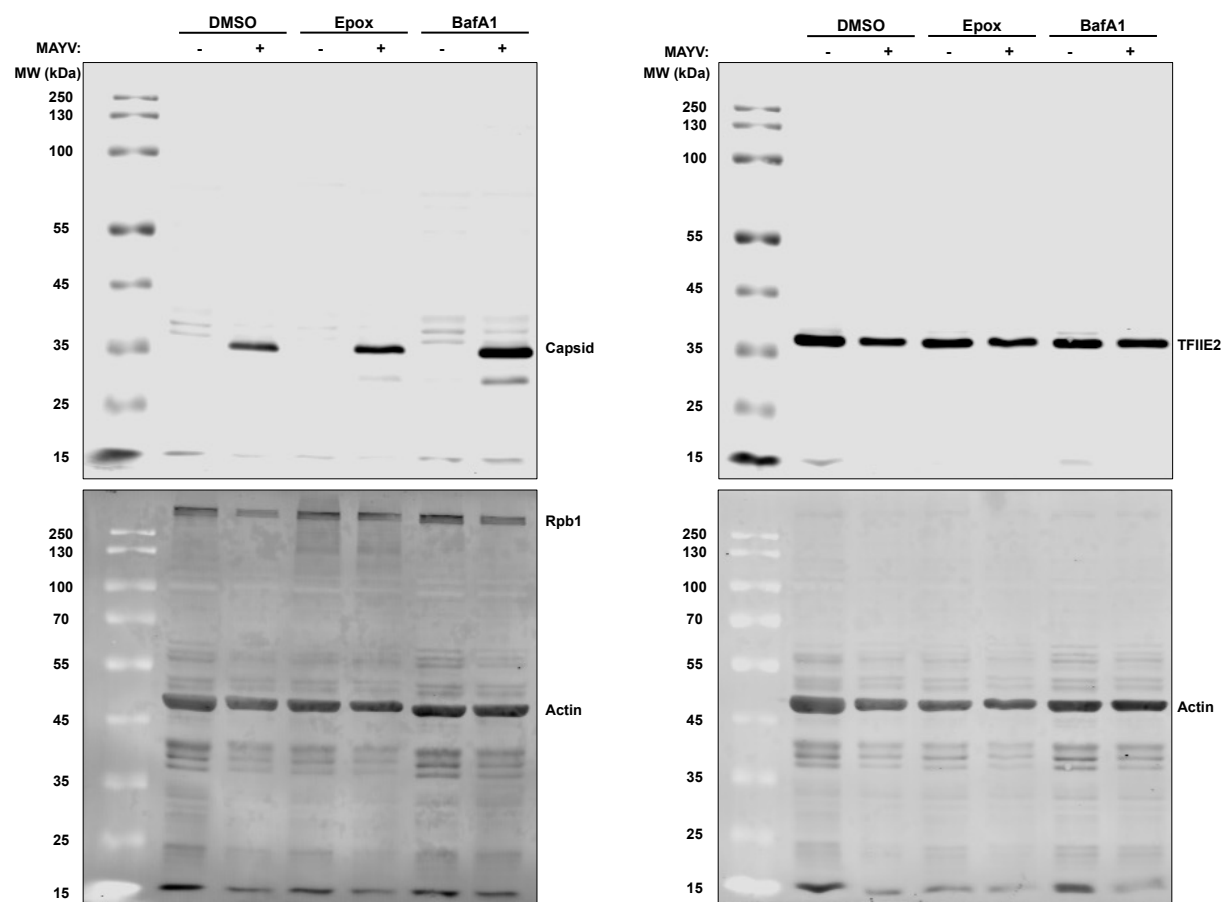

**Figure S4.** Full blot images from Figure 5E.

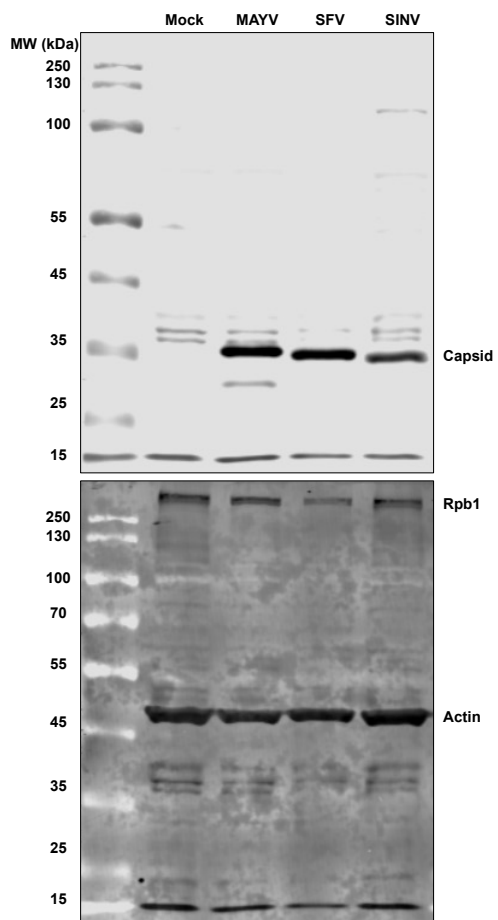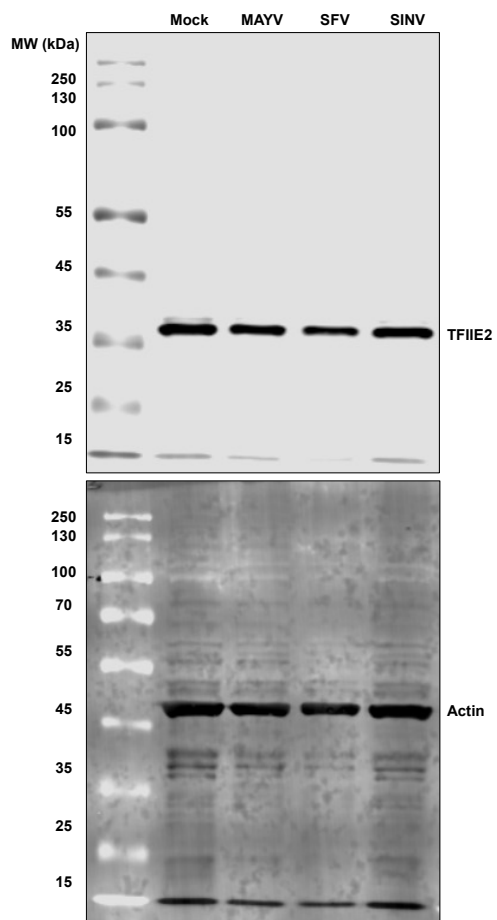

**Figure S5.** Full blot images of Figure 5H.

**Table S1.** Primers used for cloning viral proteins.

| PCR Target                | Primer sequences (5'→3')                                                                                                                                                                                         |
|---------------------------|------------------------------------------------------------------------------------------------------------------------------------------------------------------------------------------------------------------|
| nsP1                      | Fwd: ATATATGCTAGCATGTCGAAAGTCTTTGTAGATATC<br>Rev: ATATATGGCCGGCCAAACTCCAACCTTCCACATCCAC                                                                                                                          |
| nsP2                      | Fwd: ATATATGCTAGCATGCGAGCGGGAGCCGGTGTGTCGAGA<br>Rev: ATATATGGCCGGCCGCAACCAGCTGCCTGCAGCACTGT                                                                                                                      |
| nsP3                      | Fwd: ATATATGCTAGCATGGCTCCAGTGTATGCCGTTAAAAGG<br>Rev: ATATATGGCCGGCCTCAAGATGAATTACTAATGGTTTC                                                                                                                      |
| nsP4                      | Fwd: ATATATGCTAGCATGCTAGGCCGTGCGGGGGCCTATATT<br>Rrev: ATATATGGCCGGCCTTTAGGACCGCCGTACAGATGTAT                                                                                                                     |
| E3-E2                     | Fwd: ATATATGCTAGCATGGCGGCCTCGACAGTGACAGCTATG<br>Rev: ATATATGGCCGGCCTGCATGTGCTTTCGGTGCGCAACA                                                                                                                      |
| C                         | Fwd:<br>GCTGGCTAGCATGGACTACAAAGACCATGACGGTGATTATAAAGATCATGACATCGA<br>CTACAAGGATGACGATGACAAGGGCGGGAGCGGCGGGATGGACTTCCTACCAACTC<br>AAGTGTT<br>Rev: GTTTAAACTTAAGCTTGGATCCTA                                        |
| 6K-E1                     | Fwd: ATATATGCTAGCATGGCAACAAATGTCTGACACCATATG<br>Rev: ATATATGGCCGGCCCCTTCTCAAAGTTATGCAAGTAAC                                                                                                                      |
| nsP2 <sup>4protease</sup> | Fwd: CAAGCTGGCTAGCATGCGAGCGGG<br>Rev: CCGCCGGGCGCGCCACATCCAAAGGAGCTGCTTCCTG                                                                                                                                      |
| nsP2 <sup>4helicase</sup> | Fwd: AGCTGGCTAGCATGTTCCAGAATAAAGCTAAAGTGTGC<br>Rev: CGCCGGGCGCGCCGCAACCAGCTG                                                                                                                                     |
| nsP2 <sup>K197N</sup>     | Fwd: CAAGCTGGCTAGCATGCGAGCGGG<br>Rev: TTCCAAAACGGGTACCAGGCATTT<br>Fusion fwd:<br>GTCTTGGGCGTGCCCGGATCTGGAAATTCAGGTATAATCAAGAGCC TGGTT<br>Fusion rev:<br>AACCAGGCTCTTGATTATACCTGAATTTCCAGATCCGGGCACGCCCA AGAC     |
| nsP2 <sup>C478A</sup>     | Fwd: CAAGCTGGCTAGCATGCGAGCGGG<br>Rev: AAAACGGGTACCAGGCATTTGGCCCAGGCCACTTTAGCTTTATTCTGGAAC                                                                                                                        |
| nsP2 <sup>RK653AA</sup>   | Fwd: AAATGCCTGGTACCCGTTTTGGAA<br>Rev: CGCCGGGCGCGCCGCAACCAGCTG<br>Fusion fwd:<br>GAGTACAACCTCATCTTGCCGAGGGCAGCGGTGACGTGGATTGCTCCGCCGACT<br>Fusion rev:<br>AGTCGGCGGAGCAATCCACGTCACCGCTGCCCTCGGCAAGATGAGGTTGTACTC |
| nsP2 <sup>P72S</sup>      | Fwd: AAATGCCTGGTACCCGTTTTGGAA<br>Rev: CGCCGGGCGCGCCGCAACCAGCTG<br>Fusion fwd: GCACTTTACCTACTGAAATCTGGGGGAAGCCTCCTTTTGAG<br>Fusion rev: CTCAAAAGGAGGCTTCCCCCAGATTTTCAGTAGGTAAAGTGC                                |

**Table S2.** Primers used for qRT-PCR.

| Target Gene   | Primer sequences (5'→3')                                         |
|---------------|------------------------------------------------------------------|
| MAYV nsP1     | Fwd: TTCCGAACCAAGTGGGATTC<br>Rev: CACTTTACGTAYGGKGATGG           |
| SeV HN        | Fwd: AAAATTACATGGCTAGGAGGGAAAC<br>Rev: GTGAATGGAATGGTTGTGACTCTTA |
| <i>ACTB</i>   | Fwd: CCTGGCACCCAGCACAAT<br>Rev: GCCGATCCACACGGAGTACT             |
| <i>ifnb</i>   | Fwd: TAGCACTGGCTGGAATGAGA<br>Rev: TCCTTGGCCTTCAGGTAATG           |
| <i>ifnl2</i>  | Fwd: AGTTCCGGGCCTGTATCCAG<br>Rev: GAGCCGGTACAGCCAATGGT           |
| <i>GAPDH</i>  | Fwd: ACAGTCAGCCGCATCTTCTT<br>Rev: GTTAAAAGCAGCCCTGGTGA           |
| <i>Tuba1a</i> | Fwd: GCAACAACCTCTCCTCTTCG<br>Rev: GAATCATCTCCTCCCCCAAT           |

**Table S3.** MiST analysis-based scoring of nsP2 interacting cellular proteins.

**Table S4.** GO enrichment analysis of nsP2 interacting cellular proteins.
